# Supplementary material for: A new facile strategy for higher loading of silver nanoparticles onto silica for efficient catalytic reduction of 4-nitrophenol
Source: Royal Society of Chemistry journal article supplement (doi:10.1039/c5ra11892a), 2015-01-01
Supplement: c5ra11892a1.pdf [file c5ra11892a1.pdf]

## Supporting information (SI)

### A new facile strategy for higher loading of silver nanoparticles onto silica for efficient catalytic reduction of 4-nitrophenol

N. Muthuchamy<sup>#</sup>, A. Gopalan<sup>#</sup> and Kwang-Pill Lee<sup>\*</sup>

<sup>#</sup>Authors contributed equally

Manuscript ID: RA-ART-06-2015 011892

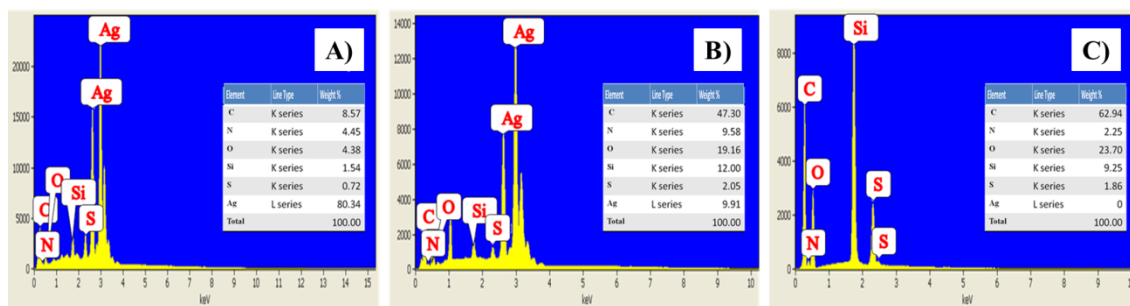

**Fig. S1.** EDAX spectrum of **A)** Ag(seed)-SiO<sub>2</sub>(p-TSA<sup>-</sup>); **B)** Ag(E)-SiO<sub>2</sub> and **C)** Pristine SiO<sub>2</sub>.

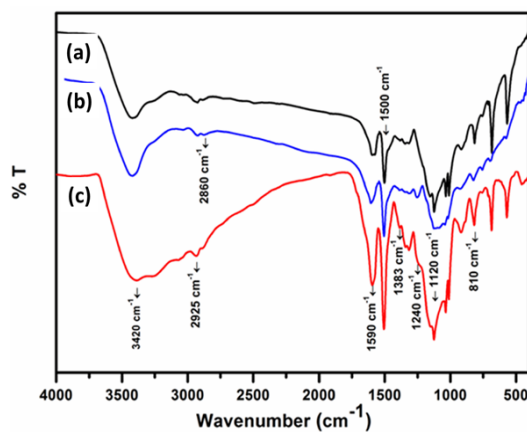

**Fig. S2.** FTIR spectrum of (a) Ag(E)-SiO<sub>2</sub>, (b) Ag(seed)-SiO<sub>2</sub>(p-TSA<sup>-</sup>) and (c) pristine SiO<sub>2</sub>.

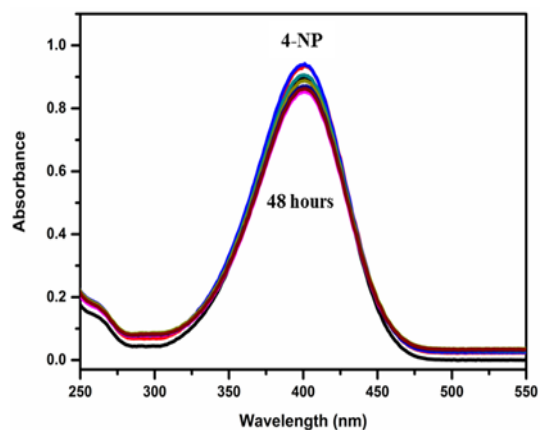

**Fig. S3.** UV-vis spectra recorded during the reduction of 4-NP in the presence of pristine SiO<sub>2</sub> catalyst; Amount of catalyst = 0.25 g/L, [NaBH<sub>4</sub>] = 50 mM and [4-NP] = 0.5 mM

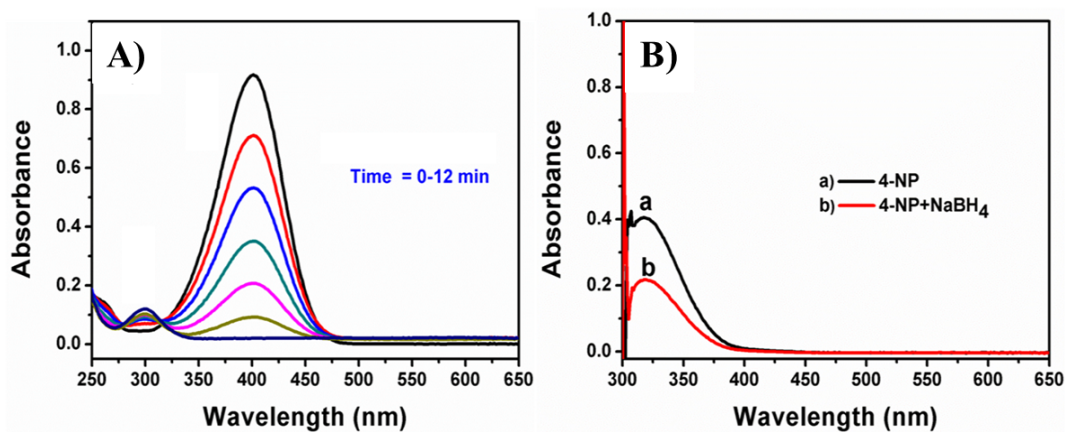

**Fig. S4.** Successive UV-vis spectra recorded during the reduction of 4-NP with different pH **A)** pH=10 and **B)** pH=5 in presence of Ag(seed)-SiO<sub>2</sub>(p-TSA<sup>-</sup>) catalyst; Amount of catalyst = 0.25 g/L and [4-NP]= 0.5 mM.

**SI: Table. T1** Experimental conditions for 4-nitrophenol reduction

| <b>Concentration of 4-Nitrophenol (mM)</b> | <b>Amount of Catalyst* (g/L)</b> | <b>pH medium</b> | <b>Temperature (Kelvin)</b> |
|--------------------------------------------|----------------------------------|------------------|-----------------------------|
| 0.50                                       | 0.25                             | 7                | 298                         |
| 0.75                                       | 0.25                             | 7                | 298                         |
| 1.00                                       | 0.25                             | 7                | 298                         |
| 1.25                                       | 0.25                             | 7                | 298                         |
| 0.50                                       | 0.00                             | 7                | 298                         |
| 0.50                                       | 0.05                             | 7                | 298                         |
| 0.50                                       | 0.10                             | 7                | 298                         |
| 0.50                                       | 0.15                             | 7                | 298                         |
| 0.50                                       | 0.25                             | 5                | 298                         |
| 0.50                                       | 0.25                             | 10               | 298                         |
| 0.50                                       | 0.25                             | 7                | 313                         |
| 0.50                                       | 0.25                             | 7                | 333                         |

\*Catalyst = Ag (E)-SiO<sub>2</sub> or Ag(seed)-SiO<sub>2</sub>(p-TSA<sup>-</sup>) or pristine SiO<sub>2</sub>

**SI: Table. T2** The comparison of Ag NPs sizes

| Catalyst                                                  | Ag NP size (nm)          | References |
|-----------------------------------------------------------|--------------------------|------------|
| Fe <sub>3</sub> O <sub>4</sub> @SiO <sub>2</sub> -Ag MNPs | 10                       | 1          |
| Fe <sub>3</sub> O <sub>4</sub> /SiO <sub>2</sub> @Ag      | 30                       | 2          |
| micron-SiO <sub>2</sub> @nano-Ag particles                | 10-60                    | 3          |
| Ag <sub>5</sub> @SBA-15                                   | ~7                       | 4          |
| Cu/Ag bimetallic nanoparticles                            | 14.3±2.2                 | 5          |
| SiO <sub>2</sub> supported-Ag NPs                         | Wide ranges<br>2 to 51nm | 6          |

## References

1. D. Xiaoyan, H. Jiang, Z. Jie, S. Lijuan and A. Songsong, *Appl. Surf. Sci.*, 2012, **258**, 2717– 2723
2. K. S. Shina, Y. K. Choa, J. Y. Choib and K. Kim, *Appl. Catal. A: Gen.*, 2012, **413– 414**, 170– 175.
3. W. Man, T. Di, T. Panpan and Y. Liangjie, *Appl. Surf. Sci.*, 2013, **283**, 389– 395.
4. B. Naik, S. Hazra, V.S. Prasad and N. N Ghosh, *Catal. Commun.*, 2011, **12**, 1104–1108.
5. W. Wu, M. Lei, S. Yang, L. Zhou, L. Liu, X. Xiao, C. Jiang and V. A. L. Roy, *J. Mater. Chem. A*, 2015, **3**, 3450-3455.
6. V. Raji, M. Chakraborty, and P. A. Parikh, *Ind. Eng. Chem. Res.*, 2012, **51**, 5691–5698.
